# Supplementary material for: A MAGEL2-deubiquitinase complex modulates the ubiquitination of circadian rhythm protein CRY1
Source: PubMed Central journal article supplement (PMC7173924; doi:10.1371/journal.pone.0230874), 2020-04-21

Full blots: Figure 1.

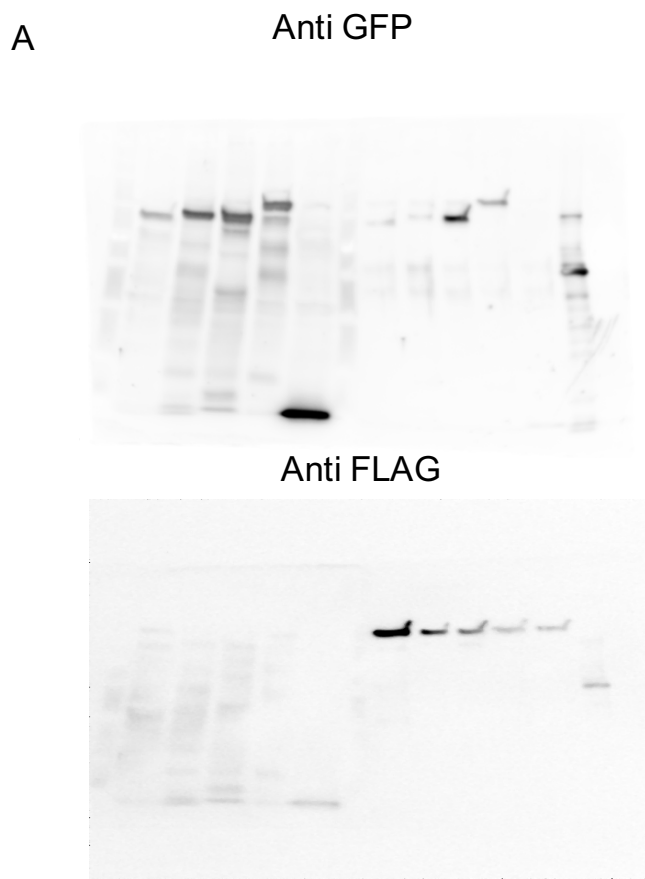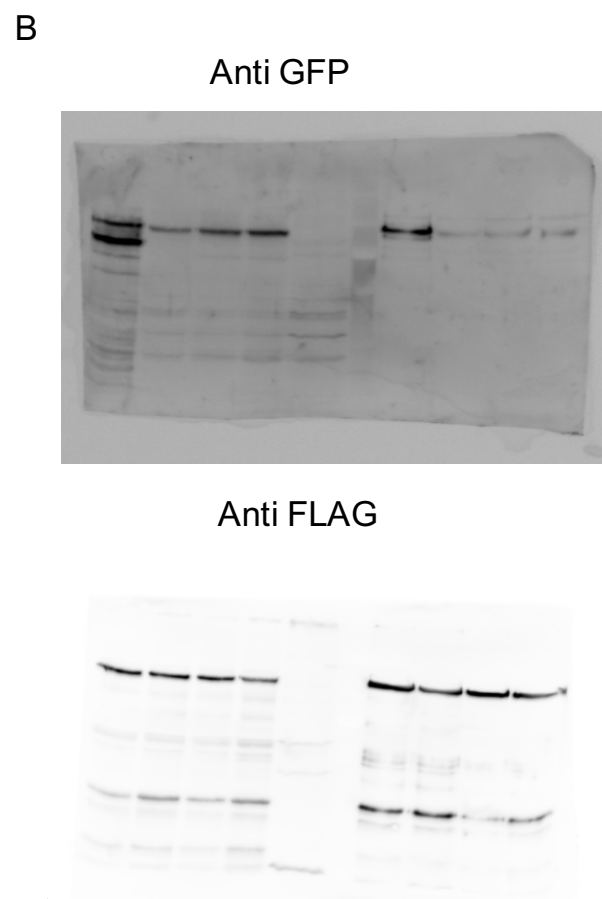

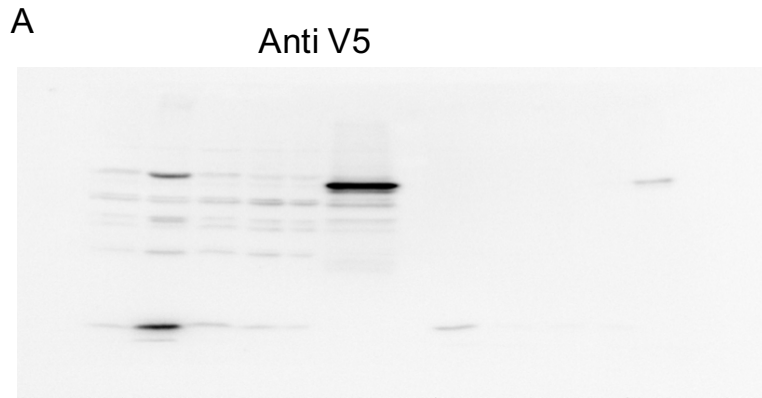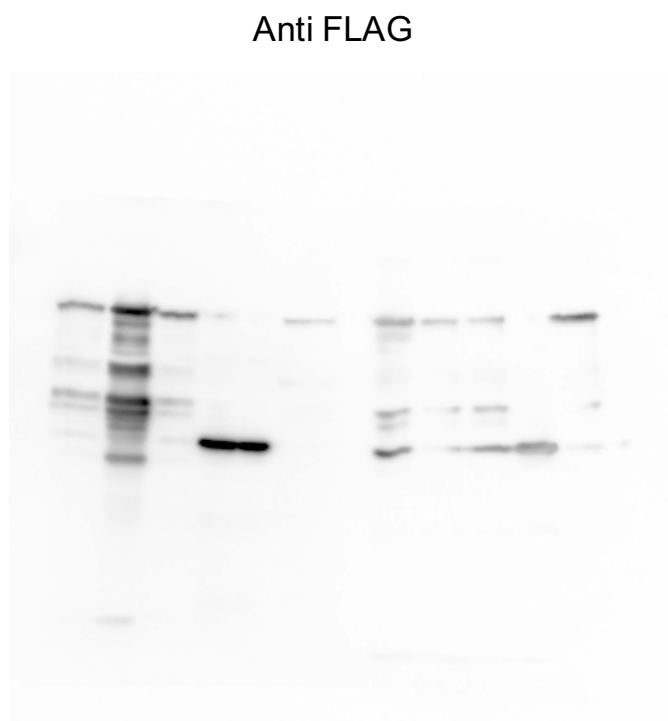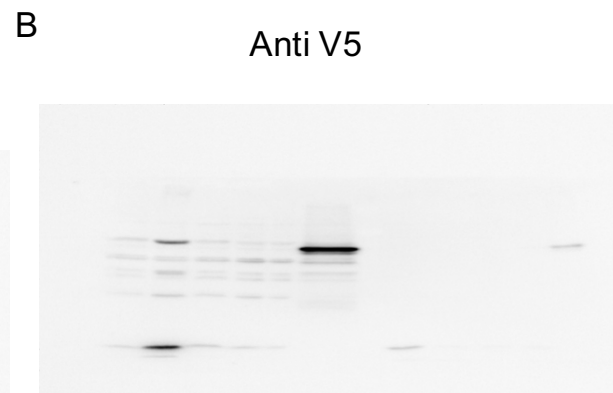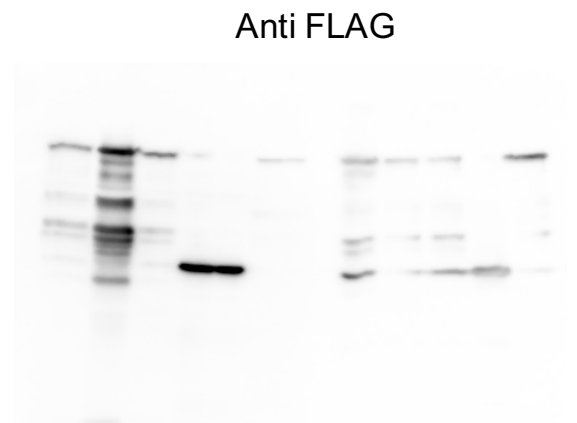

Carias Figure 4

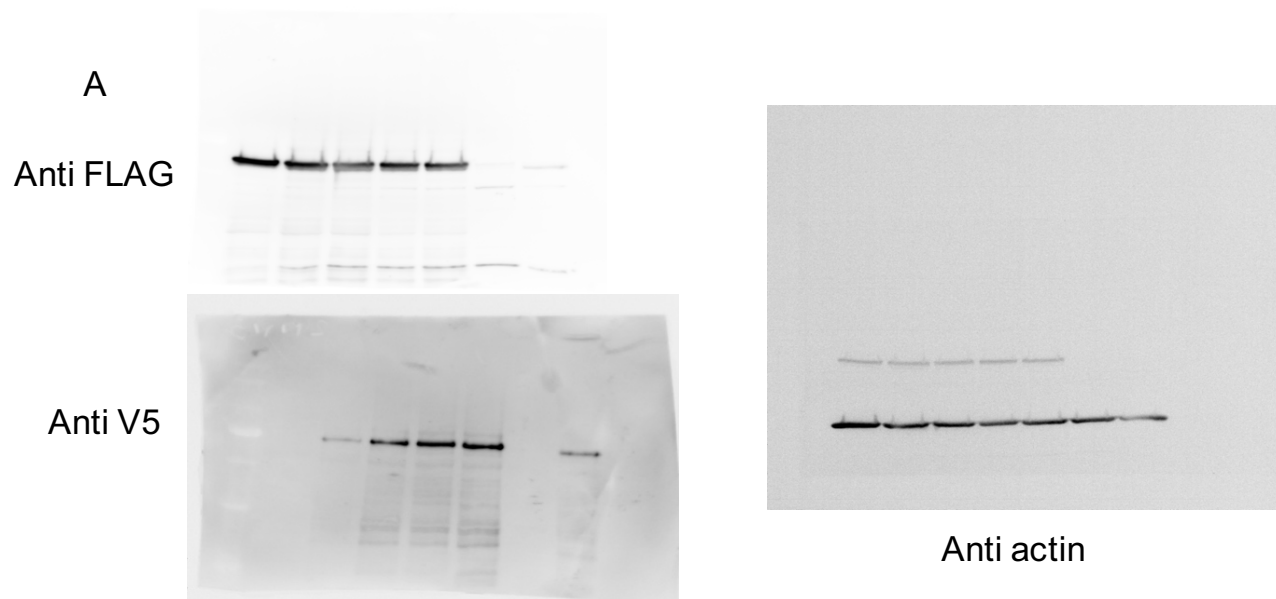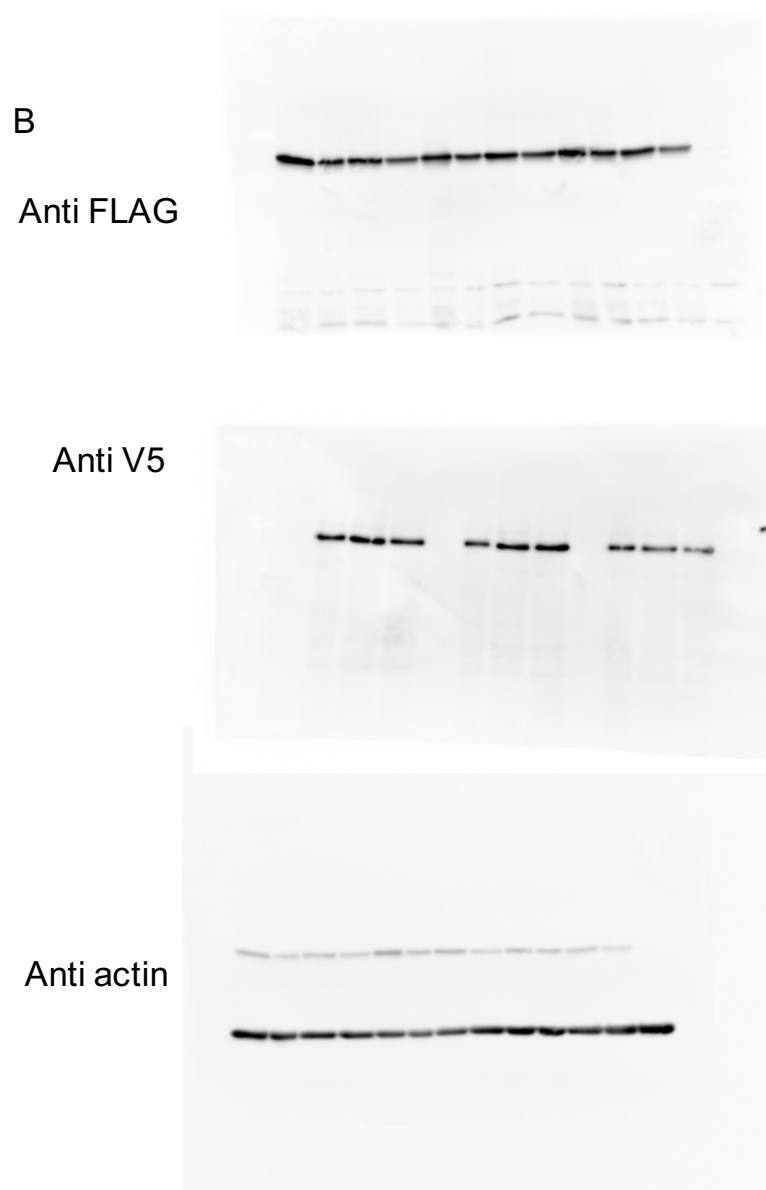

Carias Figure 5

Anti FLAG

A

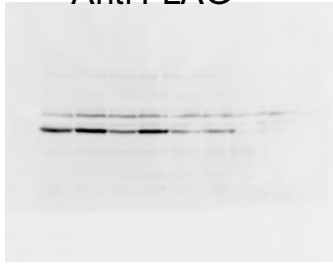

B

Anti V5

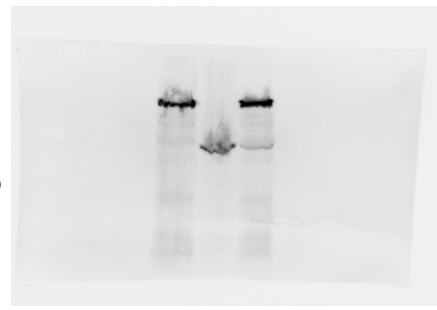

kDa

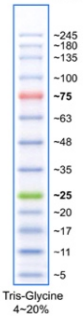

Anti V5

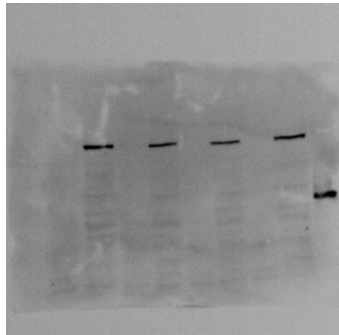

Anti FLAG

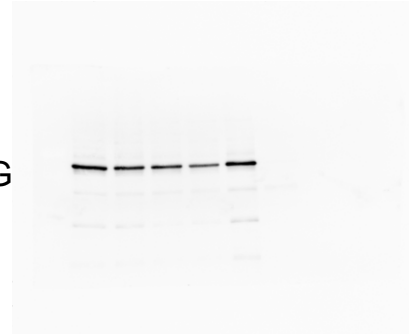

Anti actin

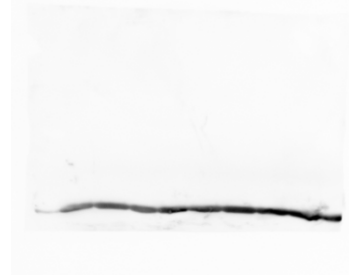

Anti HA

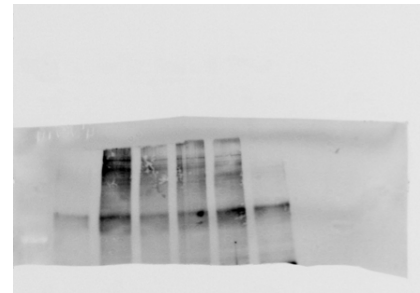

C

Anti V5

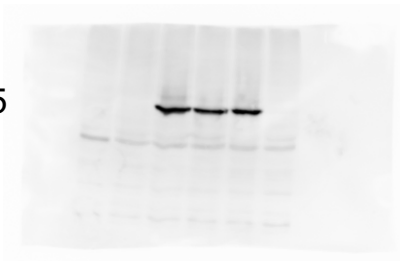

Anti FLAG

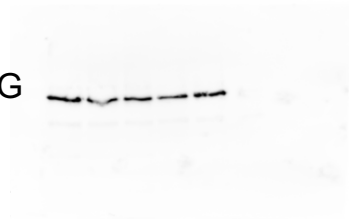

Anti HA

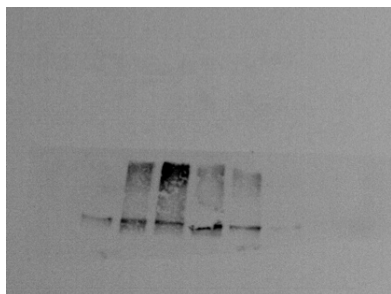

Supplement: pone.0230874.s005.pdf [file pone.0230874.s005.pdf]
